# Supplementary material
Source: MDPI journal article supplement (https://www.mdpi.com/2073-4441/13/15/2040)
Supplement: s1 [file s1 › water-1270918-supplementary.pdf]

## Supplementary materials

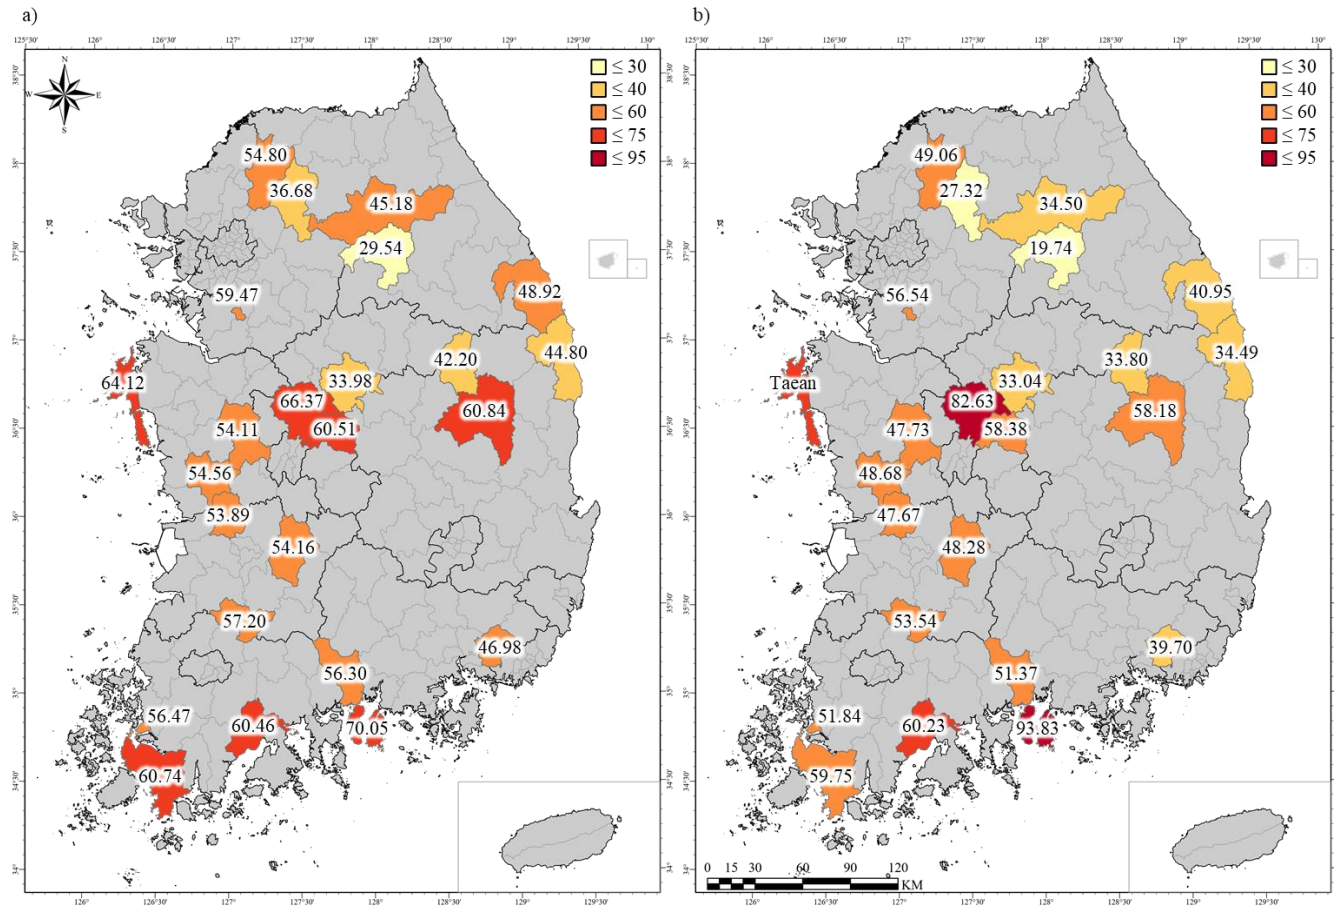

**Figure S1.** County-level a) mean and b) median WTP estimated using the intercept-only DBDC model.
